# Supplementary material
Source: Springer Nature journal article supplement (https://www.springermedizin.de/resource/supplementary/12982_2014_123_MOESM4_ESM.pdf/9604252)

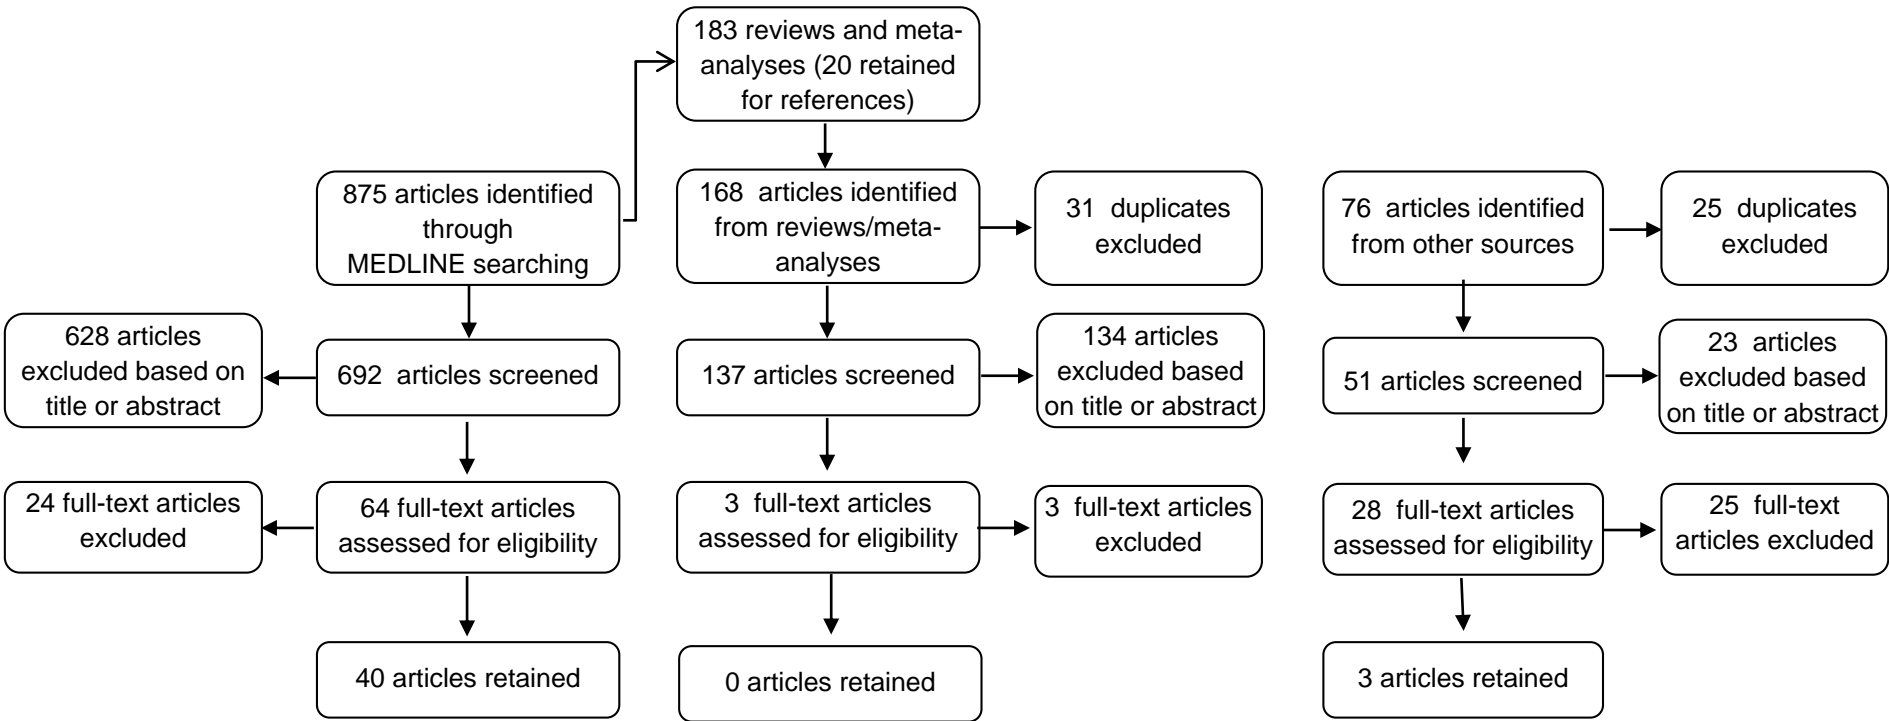

Supplement: MOESM4 [file 9604252]
